# Supplementary material
Source: PubMed Central journal article supplement (PMC7107572)
Supplement: NIHMS1532844-supplement-SuppInfo.pdf [file NIHMS1532844-supplement-SuppInfo.pdf]

## **Supplemental Information**

1. Supplemental Figures (S1-S6)
2. Supplemental Tables (S1-S8)
3. Extended Materials and Methods
4. Supplemental References

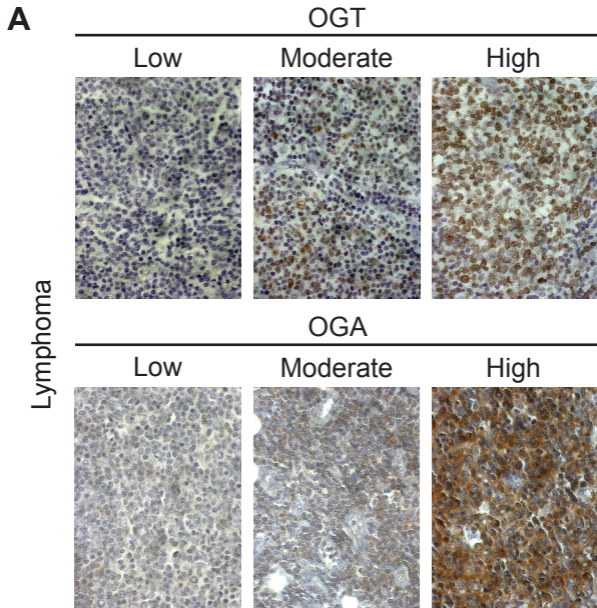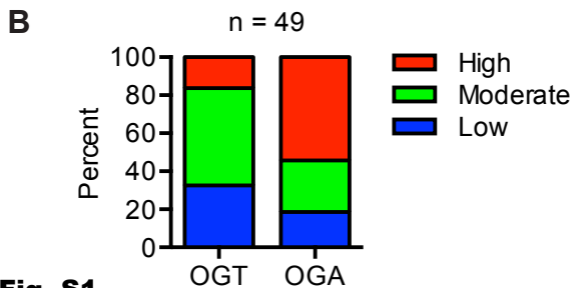

**Fig. S1**

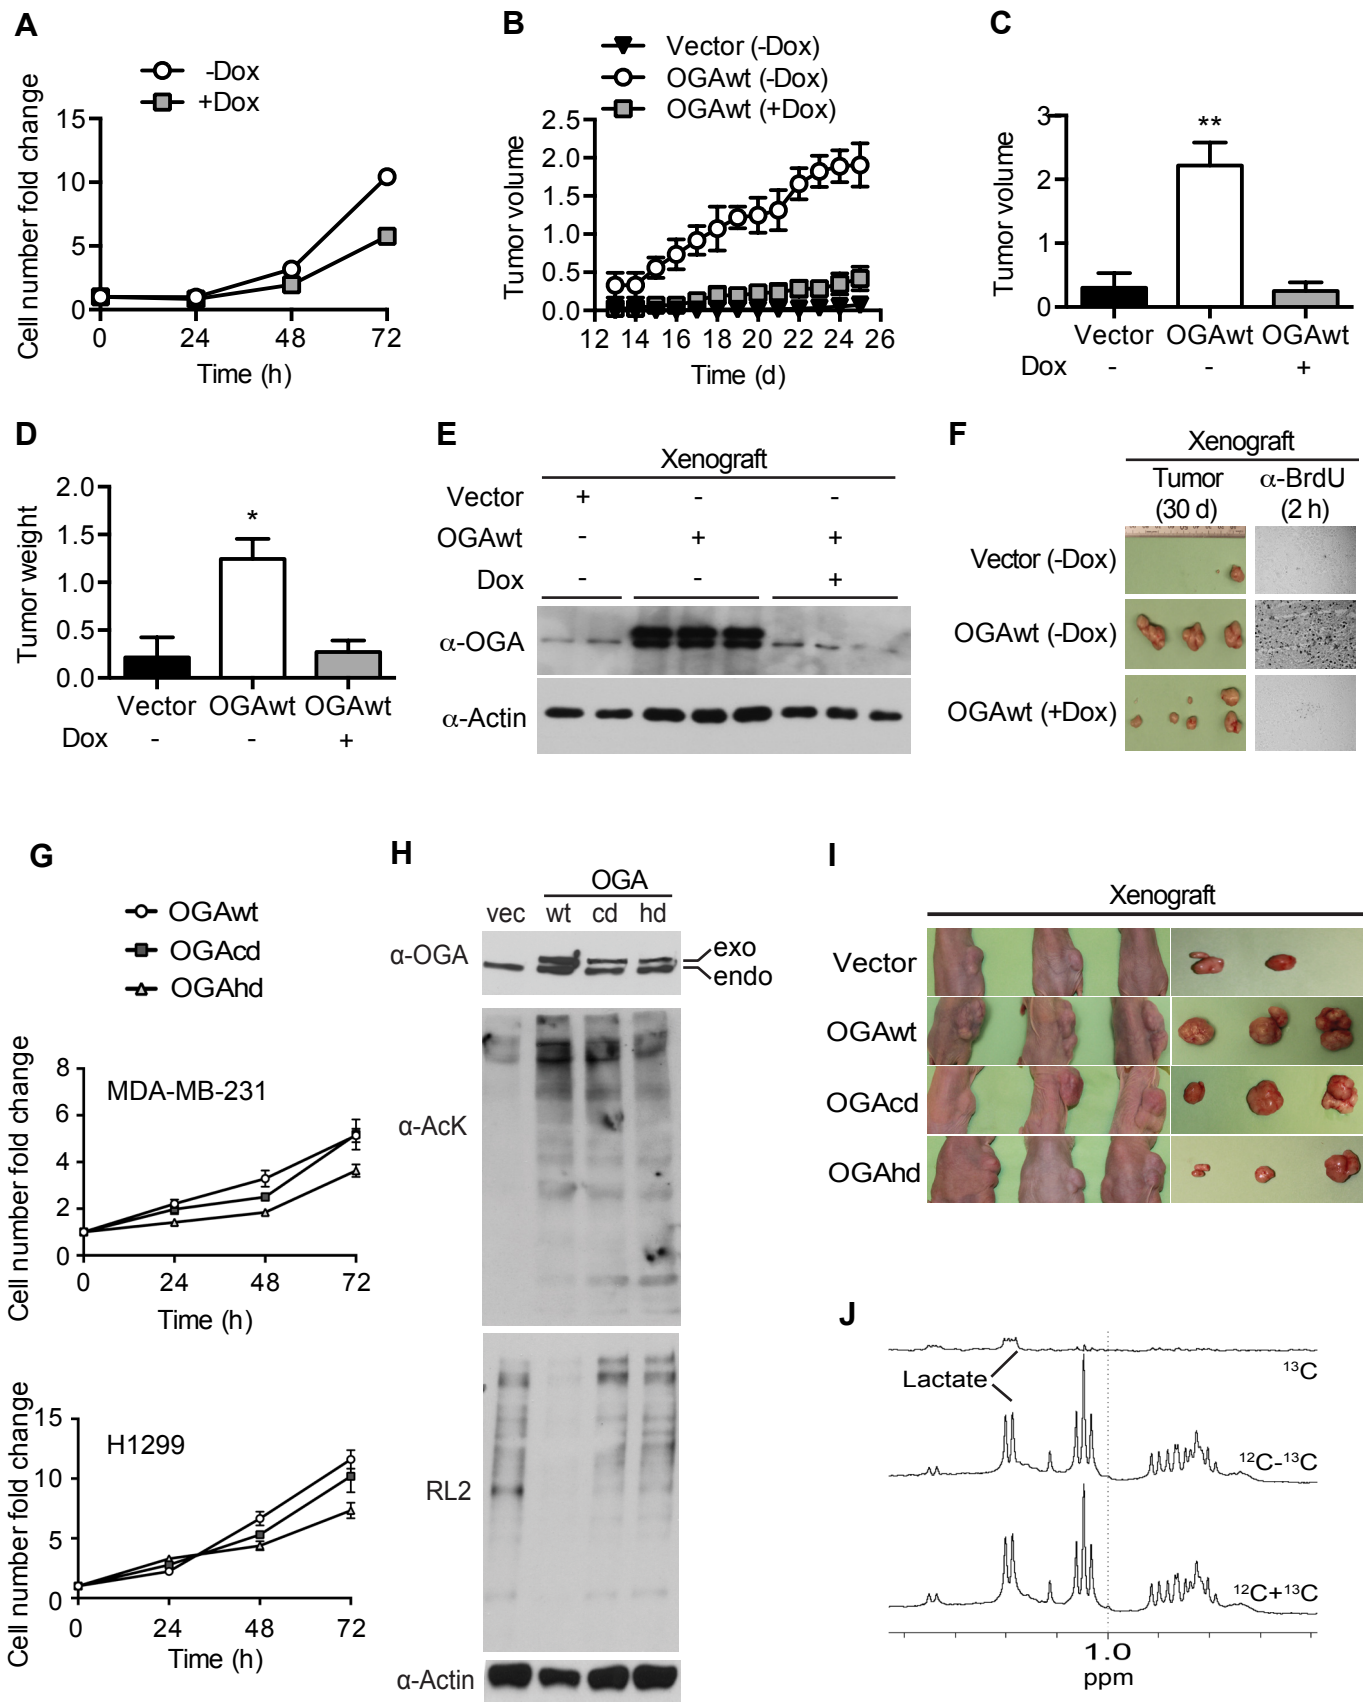

**Fig. S2**

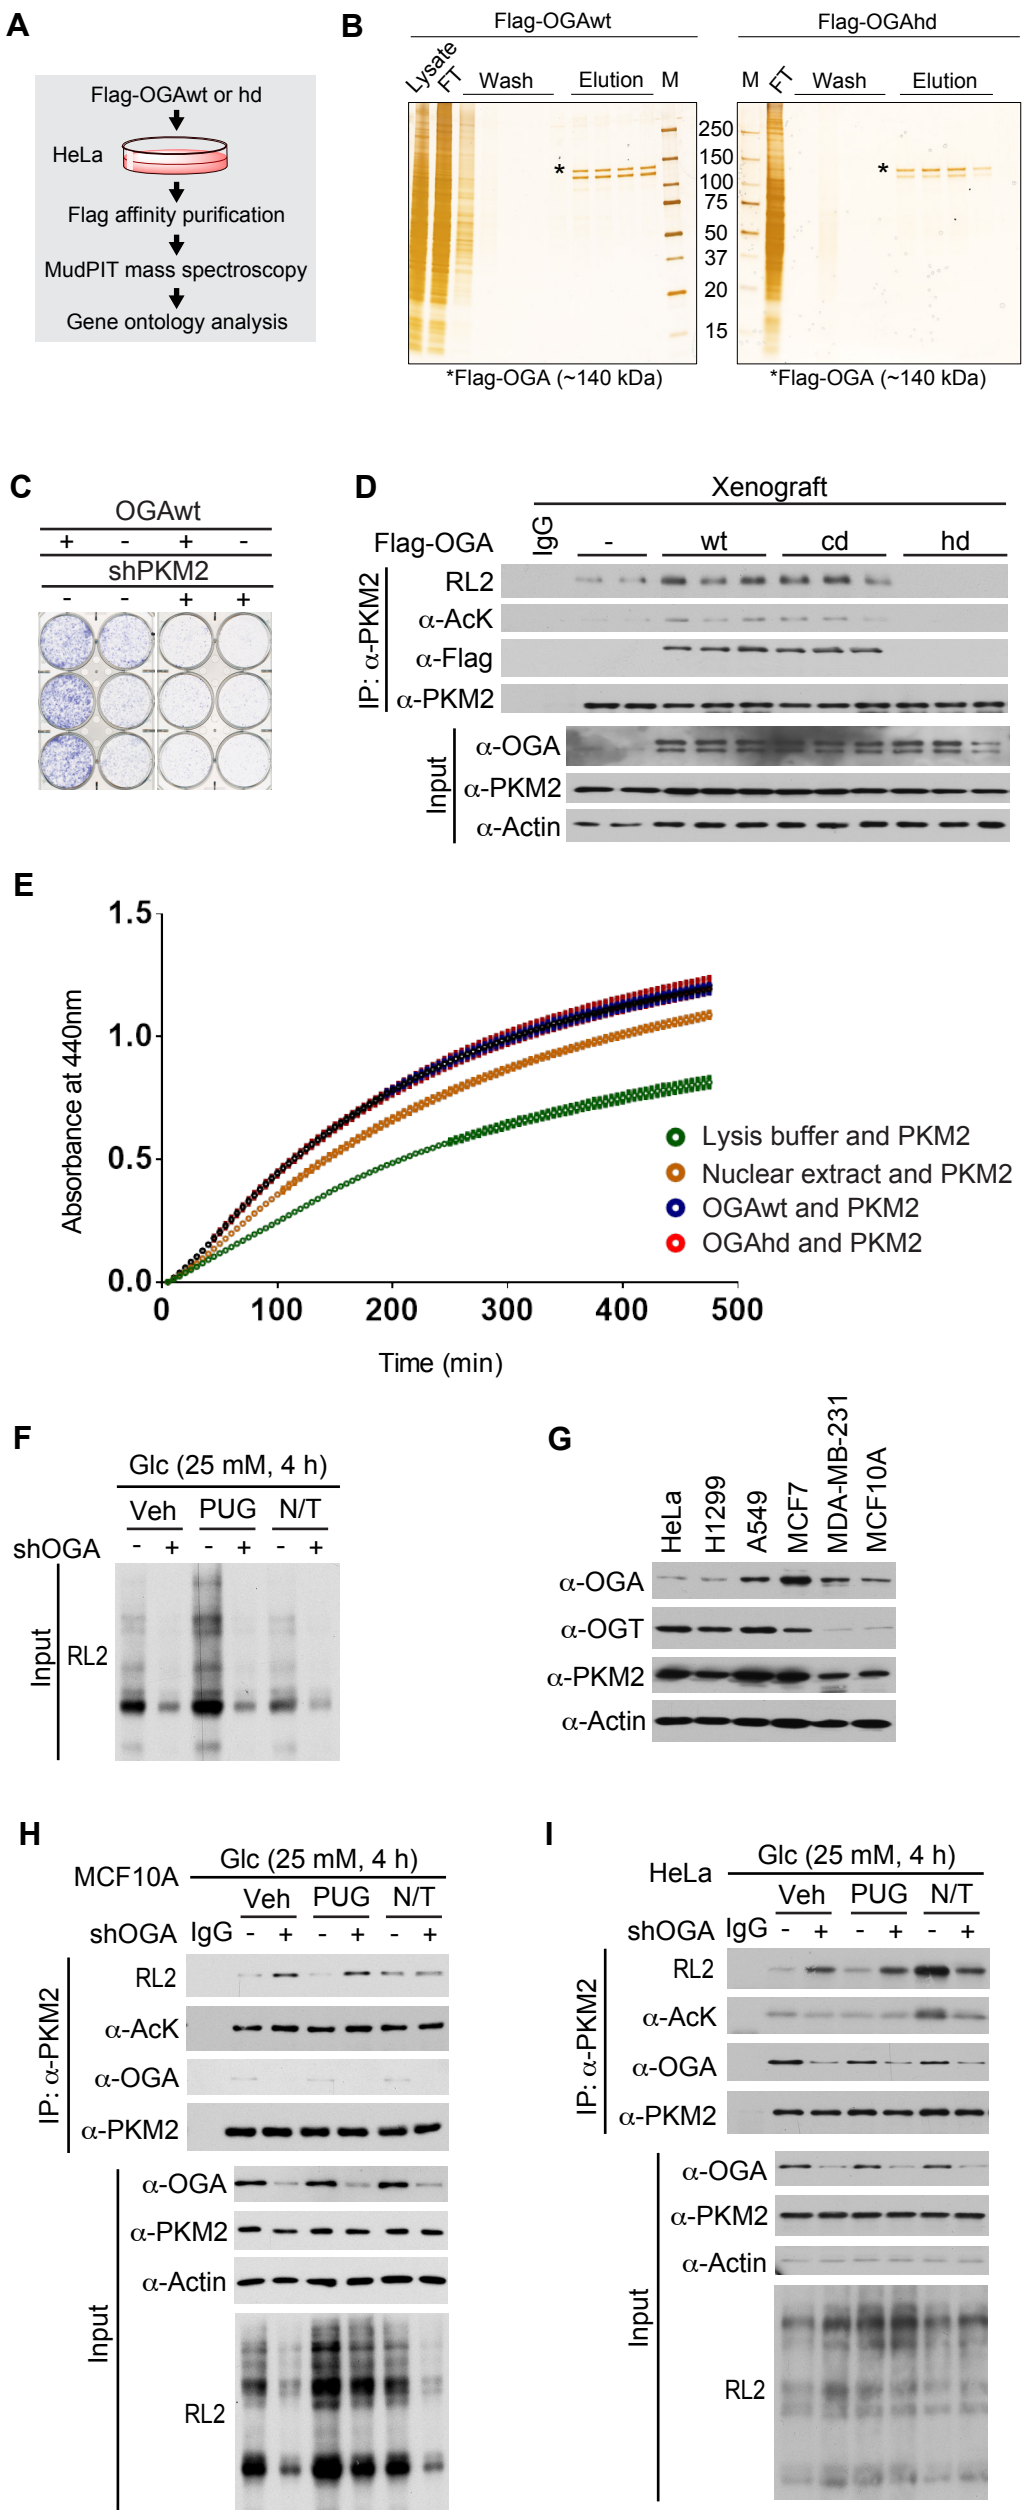

**Fig. S3**

| Glc (mM, 4 h) | 1 |   |   | 5 |   |   | 25 |   |   |
|---------------|---|---|---|---|---|---|----|---|---|
| Vehicle       | + | - | - | + | - | - | +  | - | - |
| PUGNAc        | - | + | - | - | + | - | -  | + | - |
| NAM/TSA       | - | - | + | - | - | + | -  | - | + |

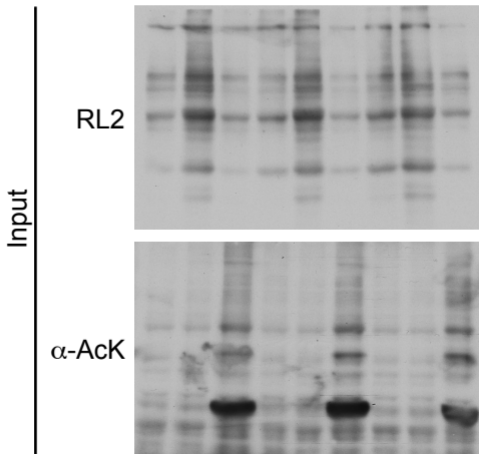

**Fig. S4**

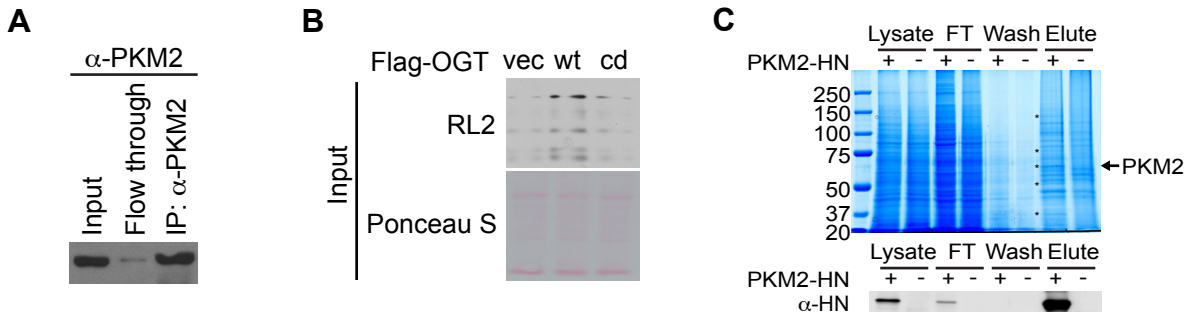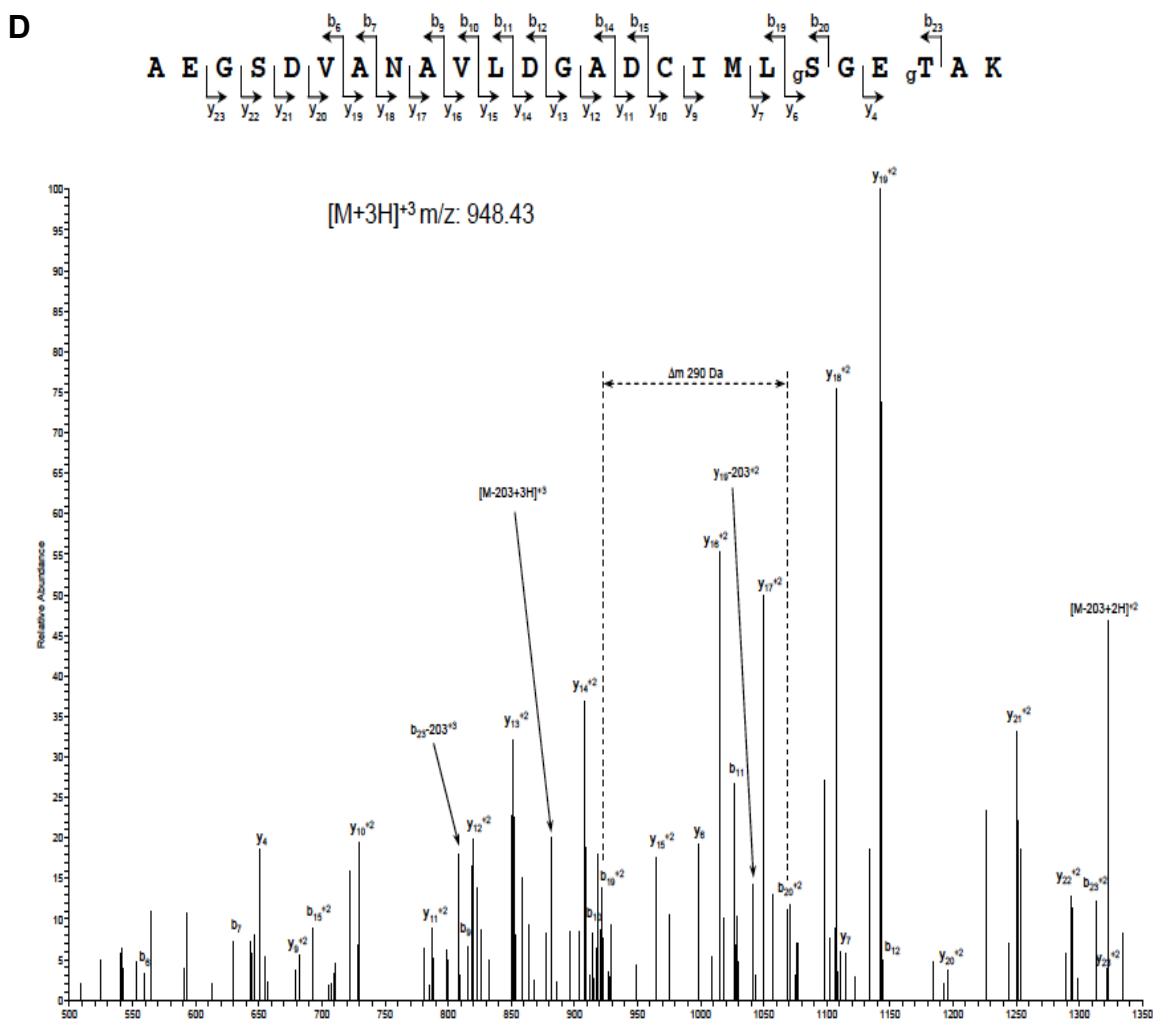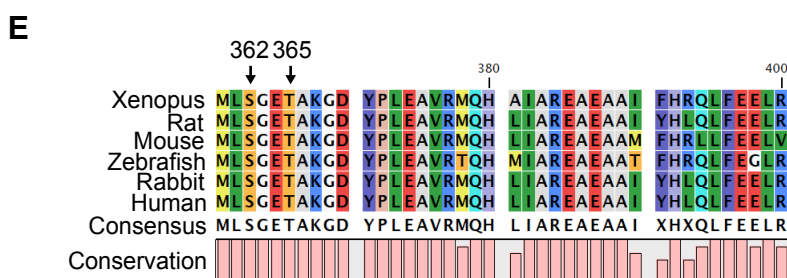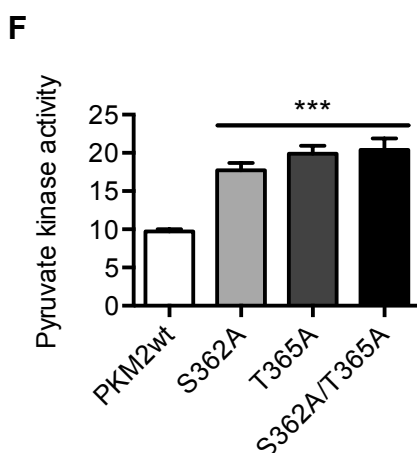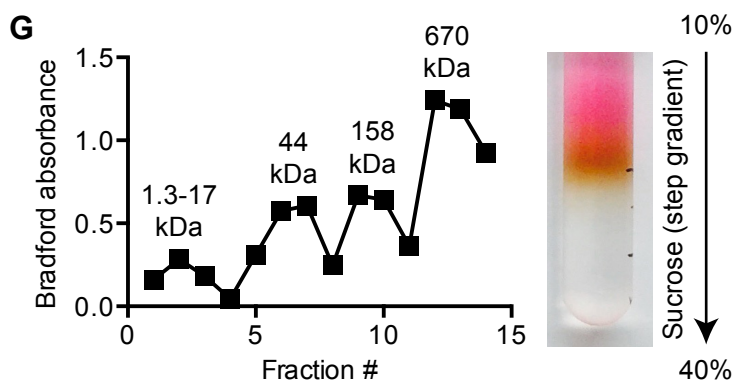

**Fig. S5**

**A**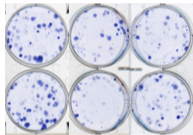

PKM2wt

S362A

T365A

**Fig. S6****B**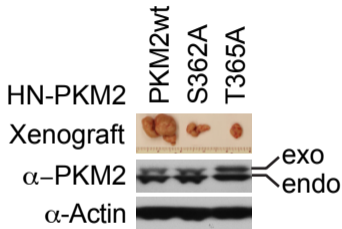

**Figure S1 (related to Figure 1).** (A) Representative images of immunohistochemical analysis of OGT and OGA expression levels in lymphomas (magnification: 40X). (B) Stratification of lymphomas into low, moderate, and high expression of OGT or OGA.

**Figure S2 (related to Figure 2).** (A) Cell number fold change of Tet-Off HeLa cells overexpressing OGA without and with doxycycline over 72 hours (n = 6). (B) HeLa cells expressing vector were injected subcutaneously into the flanks of nude mice without doxycycline feeding. HeLa cells overexpressing OGA were injected subcutaneously into the flanks of nude mice without and with doxycycline feeding. Daily progression of the xenograft tumors is shown (n = 3). (C) Volume and (D) weight of the xenograft tumors at the end of the 25-day period (n = 3). (E) Western blot analysis of xenograft tumor homogenate confirming overexpression of OGA and silencing of OGA overexpression with doxycycline. (F) Images of the isolated xenograft tumors and representative images of BrdU incorporation. (G) Cell number fold change of MDA-MB-231 and H1299 stable cell lines expressing OGAwt, OGAc, or OGAhd over 72 hours (n = 6). (H) Western blot analysis of Tet-Off HeLa cells expressing vector, OGAwt, OGAc, or OGAhd. Endogenous and exogenous OGA are labeled. (I) Images of vector, OGAwt, OGAc, and OGAhd xenograft tumors before and after surgical removal. (J) Representative  $^1\text{H}$ - $^{13}\text{C}$  NMR (POCE) spectra of HeLa cell metabolite extracts. (Top trace)  $^{13}\text{C}$  difference spectrum obtained by subtracting the (middle trace)  $^{13}\text{C}$ -inverted ( $^{12}\text{C} - ^{13}\text{C}$ ) spectrum from the (bottom trace) non-inverted ( $^{12}\text{C} + ^{13}\text{C}$ ) total spectrum. All values represent mean  $\pm$  SEM. For C-D, ordinary one-way ANOVA plus Tukey's multiple comparisons test was used to compare each column with every other column (\*p < 0.05, \*\*p < 0.01 as compared to vector/-Dox and OGAwt/+Dox).

**Figure S3 (related to Figure 3).** (A) Schematic representation of the experimental procedure used for differential proteomic analysis of OGA-binding proteins. (B) Silver stains confirming



purification of Flag-OGA. **(C)** Images of crystal violet staining for clonogenic assay of HeLa cells expressing OGAWt and infected with lentivirus encoding shPKM2. **(D)** Western blot analysis of immunoprecipitated PKM2 in vector, OGAWt, OGAcD, and OGAhd xenograft tumor homogenate. **(E)** *In vitro* acetyltransferase activity assay using 2  $\mu$ g OGAWt or OGAhd expressed in and purified from HEK293T cells and 2  $\mu$ mol recombinant PKM2 (n = 3). HeLa cell nuclear extract was used as a positive control for acetyltransferase activity. All values represent mean  $\pm$  SD. **(F)** MCF7 cells were infected with adenovirus encoding shOGA and treated with 25 mM glucose plus the indicated inhibitors for 4 hours. Whole cell lysates were analyzed by Western blotting with the RL2 antibody. **(G)** Comparison of basal OGA, OGT, and PKM2 expression levels among six cell lines by Western blotting with the indicated antibodies. **(H)** MCF10A and **(I)** HeLa cells were infected with adenovirus encoding shOGA and treated with 25 mM glucose plus the indicated inhibitors for 4 hours. PKM2 was immunoprecipitated and analyzed by Western blotting with the indicated antibodies.

**Figure S4 (related to Figure 4).** HeLa cells were treated with the indicated glucose concentrations plus the indicated inhibitors for 4 hours. Whole cell lysates were analyzed by Western blotting with the indicated antibodies.

**Figure S5 (related to Figure 5).** **(A)** Western blot analysis of PKM2 immunoprecipitation efficiency. **(B)** HeLa cells were transiently transfected with the indicated plasmids. Whole cell lysates were analyzed by Western blotting with the RL2 antibody. **(C)** Coomassie blue stain and Western blot confirming purification of HN-PKM2. **(D)** Representative CID-MS spectrum of purified HN-PKM2. **(E)** PKM2 amino acid sequence alignment. PKM2 O-GlcNAcylation sites identified by CID-MS are labeled. **(F)** Pyruvate kinase activity in HeLa cells transiently transfected with the indicated plasmids (n = 4). All values represent mean  $\pm$  SEM. Ordinary one-way ANOVA plus Tukey's multiple comparisons test was used to compare each column with

every other column (\*\*p < 0.001 as compared to PKM2wt). **(G)** (Left) Separation of native protein molecular weight markers by sucrose density gradient ultracentrifugation. Individual peaks and their respective molecular weight markers are labeled. (Right) Image of sucrose density gradient after ultracentrifugation. 1.3 and 17 kDa markers are colored.

**Figure S6 (related to Figure 6).** **(A)** Image of crystal violet staining for clonogenic assay of HeLa cells expressing PKM2wt, S362A, or T365A. **(B)** (Top) Representative image of isolated PKM2wt, S362A, and T365A xenograft tumors. (Bottom) Western blot analysis of endogenous and exogenous PKM2 using the indicated antibodies.

**Table S1: Cancer vs. Normal Comparison of OGT mRNA expression**

| <b>Comparison</b>                                                                 | <b>Fold change</b> | <b>P</b> |
|-----------------------------------------------------------------------------------|--------------------|----------|
| Chronic Lymphocytic Leukemia vs. Normal (Haferlach Leukemia)                      | 2.039              | 1.48E-48 |
| Myxoid/Round Cell Liposarcoma vs. Normal (Barretina Sarcoma)                      | 4.056              | 2.05E-13 |
| Prostate Carcinoma vs. Normal (Grasso Prostate)                                   | 2.091              | 1.53E-12 |
| Mixed Germ Cell Tumor, NOS vs. Normal (Korkola Seminoma)                          | 2.574              | 5.08E-11 |
| Colorectal Carcinoma vs. Normal (Hong Colorectal)                                 | 1.749              | 1.43E-10 |
| Prostate Carcinoma vs. Normal (Yu Prostate)                                       | 1.589              | 2.99E-10 |
| Cirrhosis vs. Normal (Mas Liver)                                                  | 1.755              | 5.92E-10 |
| Pleomorphic Liposarcoma vs. Normal (Barretina Sarcoma)                            | 2.278              | 9.32E-10 |
| Colon Carcinoma vs. Normal (Skrzypczak Colorectal 2)                              | 2.311              | 1.78E-09 |
| Embryonal Carcinoma, NOS vs. Normal (Korkola Seminoma)                            | 2.926              | 2.63E-09 |
| Seminoma, NOS vs. Normal (Korkola Seminoma)                                       | 2.483              | 1.03E-08 |
| Chronic Lymphocytic Leukemia vs. Normal (Basso Lymphoma)                          | 1.762              | 2.48E-08 |
| Multiple Myeloma vs. Normal (Zhan Myeloma)                                        | 1.672              | 2.67E-08 |
| Teratoma, NOS vs. Normal (Korkola Seminoma)                                       | 3.208              | 4.83E-08 |
| B-Cell Acute Lymphoblastic Leukemia vs. Normal (Andersson Leukemia)               | 1.766              | 6.44E-08 |
| Angioimmunoblastic T-Cell Lymphoma vs. Normal (Piccaluga Lymphoma)                | 1.821              | 4.42E-07 |
| Glioblastoma vs. Normal (Murat Brain)                                             | 1.349              | 4.59E-07 |
| Glioblastoma vs. Normal (Shai Brain)                                              | 1.334              | 4.65E-07 |
| Prostate Adenocarcinoma vs. Normal (Wallace Prostate)                             | 2.811              | 7.95E-07 |
| Infiltrating Bladder Urothelial Carcinoma vs. Normal (Sanchez-Carbayo Bladder 2)  | 1.451              | 1.01E-06 |
| Head and Neck Squamous Cell Carcinoma vs. Normal (Ginos Head-Neck)                | 1.481              | 1.83E-06 |
| Chronic Lymphocytic Leukemia vs. Normal (Haslinger Leukemia)                      | 2.9                | 3.22E-06 |
| Superficial Bladder Cancer vs. Normal (Dyrskjot Bladder 3)                        | 1.8                | 5.20E-06 |
| Colorectal Carcinoma vs. Normal (Skrzypczak Colorectal)                           | 1.402              | 7.48E-06 |
| Pleural Malignant Mesothelioma vs. Normal (Gordon Mesothelioma)                   | 1.829              | 1.01E-05 |
| Prostate Carcinoma vs. Normal (Arredouani Prostate)                               | 2.267              | 2.05E-05 |
| Monoclonal Gammopathy of Undetermined Significance vs. Normal (Zhan Myeloma 3)    | 1.559              | 3.31E-05 |
| Salivary Gland Adenoid Cystic Carcinoma vs. Normal (FriersonHF Salivary-gland)    | 2.55               | 5.72E-05 |
| Prostate Carcinoma vs. Normal (Varambally Prostate)                               | 1.771              | 6.66E-05 |
| Benign Melanocytic Skin Nevus vs. Normal (Talentov Melanoma)                      | 1.749              | 8.13E-05 |
| Hepatocellular Carcinoma vs. Normal (Wurmbach Liver)                              | 1.905              | 9.27E-05 |
| Tall Cell Variant Thyroid Gland Papillary Carcinoma vs. Normal (Giordano Thyroid) | 1.245              | 9.47E-05 |
| Invasive Breast Carcinoma vs. Normal (Gluck Breast)                               | 1.656              | 1.37E-04 |
| Lung Adenocarcinoma vs. Normal (Hou Lung)                                         | 1.365              | 1.37E-04 |
| Round Cell Liposarcoma vs. Normal (Detwiller Sarcoma)                             | 2.752              | 1.46E-04 |
| Lung Adenocarcinoma vs. Normal (Su Lung)                                          | 1.525              | 1.86E-04 |
| Gastric Mixed Adenocarcinoma vs. Normal (DErrico Gastric)                         | 2.09               | 2.61E-04 |
| Renal Pelvis Urothelial Carcinoma vs. Normal (Jones Renal)                        | 1.983              | 3.03E-04 |
| Prostate Carcinoma Epithelia vs. Normal (Tomlins Prostate)                        | 1.643              | 6.11E-04 |
| Prostate Carcinoma vs. Normal (Taylor Prostate 3)                                 | 1.23               | 6.95E-04 |
| Adrenal Cortex Adenoma vs. Normal (Giordano Adrenal 2)                            | 1.107              | 0.001    |

|                                                                                   |       |       |
|-----------------------------------------------------------------------------------|-------|-------|
| Lung Adenocarcinoma vs. Normal (Landi Lung)                                       | 1.242 | 0.001 |
| Hepatocellular Adenoma vs. Normal (Chen Liver)                                    | 1.336 | 0.002 |
| Lung Adenocarcinoma vs. Normal (Beer Lung)                                        | 1.636 | 0.002 |
| Lung Adenocarcinoma vs. Normal (Stearman Lung)                                    | 1.389 | 0.002 |
| Cirrhosis vs. Normal (Wurmbach Liver)                                             | 1.588 | 0.002 |
| Ovarian Serous Adenocarcinoma vs. Normal (Yoshihara Ovarian)                      | 1.586 | 0.002 |
| Anaplastic Astrocytoma vs. Normal (Beroukhim Brain)                               | 1.325 | 0.003 |
| Gastric Cancer vs. Normal (Wang Gastric)                                          | 1.49  | 0.003 |
| Prostate Carcinoma vs. Normal (Welsh Prostate)                                    | 1.239 | 0.005 |
| Prostate Carcinoma vs. Normal (Lapointe Prostate)                                 | 1.168 | 0.005 |
| Acute Myeloid Leukemia vs. Normal (Stegmaier Leukemia)                            | 1.496 | 0.006 |
| Invasive Ductal Breast Carcinoma Stroma vs. Normal (Karnoub Breast)               | 1.511 | 0.009 |
| Prostate Carcinoma vs. Normal (Luo Prostate 2)                                    | 6.554 | 0.01  |
| Prostate Carcinoma vs. Normal (Liu Prostate)                                      | 1.362 | 0.015 |
| B-Cell Childhood Acute Lymphoblastic Leukemia vs. Normal (Coustan-Smith Leukemia) | 1.635 | 0.028 |
| Esophageal Adenocarcinoma vs. Normal (Kimchi Esophagus)                           | 1.47  | 0.046 |
| Squamous Cell Lung Carcinoma vs. Normal (Bhattacharjee Lung)                      | 1.503 | 0.076 |
| Barrett's Esophagus vs. Normal (Hao Esophagus)                                    | 1.244 | 0.104 |
| Tongue Squamous Cell Carcinoma vs. Normal (Ye Head-Neck)                          | 1.039 | 0.127 |
| Myelodysplastic Syndrome vs. Normal (Haferlach Leukemia)                          | 2.039 | 0.155 |
| Prostate Carcinoma vs. Normal (Holzbeierlein Prostate)                            | 1.142 | 0.222 |
| Barrett's Esophagus vs. Normal (Kim Esophagus)                                    | 1.078 | 0.229 |

---

**Table S2: Cancer vs. Normal Comparison of OGA mRNA expression**

| <b>Comparison</b>                                                                 | <b>Fold change</b> | <b>P</b> |
|-----------------------------------------------------------------------------------|--------------------|----------|
| Chronic Lymphocytic Leukemia vs. Normal (Haferlach Leukemia)                      | 1.559              | 9.50E-25 |
| Cirrhosis vs. Normal (Mas Liver)                                                  | 1.682              | 1.27E-10 |
| Monoclonal Gammopathy of Undetermined Significance vs. Normal (Zhan Myeloma 3)    | 1.788              | 8.66E-08 |
| Superficial Bladder Cancer vs. Normal (Dyrskjot Bladder 3)                        | 1.823              | 1.35E-07 |
| Pancreatic Ductal Adenocarcinoma vs. Normal (Badea Pancreas)                      | 1.51               | 2.99E-06 |
| Colon Carcinoma Epithelia vs. Normal (Skrzypczak Colorectal 2)                    | 1.41               | 1.44E-05 |
| Angioimmunoblastic T-Cell Lymphoma vs. Normal (Piccaluga Lymphoma)                | 1.69               | 1.87E-05 |
| Colon Carcinoma vs. Normal (Skrzypczak Colorectal 2)                              | 1.633              | 2.06E-05 |
| Clear Cell Renal Cell Carcinoma vs. Normal (Gumz Renal)                           | 2.399              | 4.32E-05 |
| Gastric Mixed Adenocarcinoma vs. Normal (Derrico Gastric)                         | 2.975              | 6.17E-05 |
| Acute Myeloid Leukemia vs. Normal (Stegmaier Leukemia)                            | 2.462              | 1.25E-04 |
| Hepatocellular Carcinoma vs. Normal (Wurmbach Liver)                              | 1.452              | 2.91E-04 |
| Adrenal Cortex Adenoma vs. Normal (Giordano Adrenal 2)                            | 1.131              | 3.02E-04 |
| Prostate Adenocarcinoma vs. Normal (Wallace Prostate)                             | 1.503              | 4.64E-04 |
| Papillary Renal Cell Carcinoma vs. Normal (Yusenko Renal)                         | 1.529              | 5.27E-04 |
| Cirrhosis vs. Normal (Wurmbach Liver)                                             | 1.996              | 7.68E-04 |
| Head and Neck Squamous Cell Carcinoma vs. Normal (Ginos Head-Neck)                | 1.487              | 0.001    |
| Invasive Ductal Breast Carcinoma Stroma vs. Normal (Karnoub Breast)               | 1.873              | 0.002    |
| Oropharyngeal Carcinoma vs. Normal (Pyeon Multi-cancer)                           | 2.076              | 0.002    |
| Oligodendroglioma vs. Normal (Shai Brain)                                         | 2.212              | 0.003    |
| Salivary Gland Adenoid Cystic Carcinoma vs. Normal (FriersonHF Salivary-gland)    | 1.739              | 0.003    |
| Gastric Cancer vs. Normal (Wang Gastric)                                          | 1.331              | 0.003    |
| Round Cell Liposarcoma vs. Normal (Detwiller Sarcoma)                             | 2.354              | 0.004    |
| Ductal Breast Carcinoma in Situ Epithelia vs. Normal (Ma Breast 4)                | 1.732              | 0.004    |
| Prostate Carcinoma vs. Normal (Arredouani Prostate)                               | 1.333              | 0.006    |
| Pleomorphic Liposarcoma vs. Normal (Detwiller Sarcoma)                            | 2.316              | 0.007    |
| Pleural Malignant Mesothelioma vs. Normal (Gordon Mesothelioma)                   | 2.912              | 0.007    |
| Cervical Squamous Cell Carcinoma Epithelia vs. Normal (Zhai Cervix)               | 1.327              | 0.01     |
| Ovarian Clear Cell Adenocarcinoma vs. Normal (Hendrix Ovarian)                    | 1.121              | 0.01     |
| Dedifferentiated Liposarcoma vs. Normal (Detwiller Sarcoma)                       | 1.67               | 0.011    |
| Skin Squamous Cell Carcinoma vs. Normal (Nindl Skin)                              | 1.364              | 0.016    |
| Tall Cell Variant Thyroid Gland Papillary Carcinoma vs. Normal (Giordano Thyroid) | 1.079              | 0.02     |
| Benign Melanocytic Skin Nevus vs. Normal (Talantov Melanoma)                      | 2.286              | 0.029    |
| Invasive Mixed Breast Carcinoma vs. Normal (Radvanyi Breast)                      | 2.507              | 0.032    |
| Chronic Lymphocytic Leukemia vs. Normal (Haslinger Leukemia)                      | 1.36               | 0.039    |
| Benign Prostatic Hyperplasia Stroma vs. Normal (Tomlins Prostate)                 | 1.547              | 0.053    |
| Prostate Carcinoma vs. Normal (Liu Prostate)                                      | 1.081              | 0.059    |
| Ovarian Mucinous Adenocarcinoma vs. Normal (Lu Ovarian)                           | 1.139              | 0.09     |
| Hepatocellular Adenoma vs. Normal (Chen Liver)                                    | 1.18               | 0.095    |
| Prostate Carcinoma vs. Normal (Luo Prostate 2)                                    | 1.177              | 0.102    |

**Table S3: Cancer vs. Normal Comparison of GFPT1 mRNA expression**

| <b>Comparison</b>                                                                         | <b>Fold change</b> | <b>P</b> |
|-------------------------------------------------------------------------------------------|--------------------|----------|
| Lung Adenocarcinoma vs. Normal (Beer Lung)                                                | 2.213              | 8.34E-10 |
| Lung Adenocarcinoma vs. Normal (Bhattacharjee Lung)                                       | 1.441              | 0.05     |
| Pancreatic Intraepithelial Neoplasia vs. Normal (Buchholz Pancreas)                       | 1.181              | 0.025    |
| Hepatocellular Adenoma vs. Normal (Chen Liver)                                            | 1.12               | 0.008    |
| Invasive Breast Carcinoma vs. Normal (Curtis Breast)                                      | 1.64               | 8.10E-05 |
| Medullary Breast Carcinoma vs. Normal (Curtis Breast)                                     | 1.514              | 5.20E-10 |
| Mucinous Breast Carcinoma vs. Normal (Curtis Breast)                                      | 1.829              | 3.36E-13 |
| Tubular Breast Carcinoma vs. Normal (Curtis Breast)                                       | 1.479              | 7.55E-16 |
| Invasive Breast Carcinoma vs. Normal (Gluck Breast)                                       | 1.526              | 1.12E-04 |
| Pancreatic Ductal Adenocarcinoma Epithelia vs. Normal (Grutzmann Pancreas)                | 1.829              | 0.014    |
| Clear Cell Renal Cell Carcinoma vs. Normal (Gumz Renal)                                   | 1.973              | 1.46E-04 |
| Myelodysplastic Syndrome vs. Normal (Haferlach Leukemia)                                  | 1.128              | 2.79E-08 |
| Barrett's Esophagus vs. Normal (Hao Esophagus)                                            | 3.345              | 4.79E-07 |
| Ovarian Clear Cell Adenocarcinoma vs. Normal (Hendrix Ovarian)                            | 1.482              | 1.04E-06 |
| Chromophobe Renal Cell Carcinoma vs. Normal (Higgins Renal)                               | 1.474              | 0.016    |
| Prostate Carcinoma vs. Normal (Holzbeierlein Prostate)                                    | 1.203              | 0.202    |
| Lung Adenocarcinoma vs. Normal (Hou Lung)                                                 | 2.13               | 4.51E-14 |
| Renal Pelvis Urothelial Carcinoma vs. Normal (Jones Renal)                                | 2.251              | 1.21E-07 |
| Rectal Mucinous Adenocarcinoma vs. Normal (Kaiser Colon)                                  | 1.564              | 2.64E-04 |
| Barrett's Esophagus vs. Normal (Kim Esophagus)                                            | 2.489              | 3.17E-07 |
| Barrett's Esophagus vs. Normal (Kimchi Esophagus)                                         | 2.03               | 0.002    |
| Seminoma, NOS vs. Normal (Korkola Seminoma)                                               | 3.56               | 6.76E-08 |
| Lung Adenocarcinoma vs. Normal (Landi Lung)                                               | 2.536              | 1.05E-23 |
| Prostate Carcinoma vs. Normal (Liu Prostate)                                              | 1.253              | 0.001    |
| Prostate Carcinoma vs. Normal (Luo Prostate 2)                                            | 3.536              | 0.021    |
| Ductal Breast Carcinoma in Situ Epithelia vs. Normal (Ma Breast 4)                        | 2.421              | 4.12E-06 |
| Anaplastic Large Cell Lymphoma vs. Normal (Piccaluga Lymphoma)                            | 2.208              | 1.46E-05 |
| Ductal Breast Carcinoma vs. Normal (Richardson Breast 2)                                  | 2.144              | 5.15E-07 |
| Prostate Carcinoma vs. Normal (Singh Prostate)                                            | 1.699              | 6.38E-06 |
| Lung Adenocarcinoma vs. Normal (Stearman Lung)                                            | 1.589              | 1.67E-07 |
| Prostate Carcinoma Epithelia vs. Normal (Tomlins Prostate)                                | 2.516              | 2.64E-05 |
| Acute Myeloid Leukemia vs. Normal (Valk Leukemia)                                         | 1.313              | 5.03E-04 |
| Prostate Adenocarcinoma vs. Normal (Vanaja Prostate)                                      | 2.141              | 2.34E-04 |
| Prostate Adenocarcinoma vs. Normal (Wallace Prostate)                                     | 1.531              | 0.003    |
| Prostate Carcinoma vs. Normal (Welsh Prostate)                                            | 2.613              | 6.25E-05 |
| Tongue Squamous Cell Carcinoma vs. Normal (Ye Head-Neck)                                  | 1.885              | 2.00E-05 |
| Renal Oncocytoma vs. Normal (Yusenko Renal)                                               | 2.222              | 7.37E-04 |
| High Grade Cervical Squamous Intraepithelial Neoplasia Epithelia vs. Normal (Zhai Cervix) | 1.435              | 0.001    |
| Monoclonal Gammopathy of Undetermined Significance vs. Normal (Zhan Myeloma 3)            | 1.609              | 6.33E-06 |

**Table S4: Immunohistochemical analysis of colon adenocarcinoma (HCol-Ade180Sur-04)**

|                           |    | OGA level |          |      | p*           |
|---------------------------|----|-----------|----------|------|--------------|
|                           |    | Low       | Moderate | High |              |
| <b>Total</b>              | 90 | 8         | 50       | 32   |              |
| <b>Gender</b>             |    |           |          |      | 0.228        |
| Male                      | 47 | 4         | 30       | 13   |              |
| Female                    | 43 | 4         | 20       | 19   |              |
| <b>Pathological grade</b> |    |           |          |      | <b>0.016</b> |
| I,I-II,II                 | 54 | 1         | 32       | 21   |              |
| II-III,III                | 36 | 7         | 18       | 11   |              |
| <b>Invasive depth</b>     |    |           |          |      | 0.678        |
| T1,T2                     | 9  | 1         | 6        | 2    |              |
| T3,T4                     | 81 | 7         | 44       | 30   |              |
| <b>Node status</b>        |    |           |          |      | 0.57         |
| N0                        | 65 | 7         | 36       | 22   |              |
| N1-N2                     | 25 | 1         | 14       | 10   |              |
| <b>Clinical stage</b>     |    |           |          |      | 0.9          |
| IA-IIA                    | 50 | 5         | 27       | 18   |              |
| IIB-IV                    | 40 | 3         | 23       | 14   |              |
| *Chi-square test          |    |           |          |      |              |

**Table S5: Immunohistochemical analysis of breast ductal carcinoma (HBre-Duc170Sur-01)**

|                           |            | OGA level |           |           | p*           |
|---------------------------|------------|-----------|-----------|-----------|--------------|
|                           |            | Low       | Moderate  | High      |              |
| <b>Total</b>              | <b>160</b> | <b>39</b> | <b>51</b> | <b>70</b> |              |
| <b>Pathological grade</b> |            |           |           |           | <b>0.008</b> |
| I,I-II                    | 44         | 18        | 13        | 13        |              |
| II,II-III,III             | 116        | 21        | 38        | 57        |              |
| <b>Invasive depth</b>     |            |           |           |           | 0.571        |
| T1                        | 37         | 12        | 9         | 16        |              |
| T2                        | 108        | 23        | 36        | 49        |              |
| T3                        | 15         | 4         | 6         | 5         |              |
| <b>Node status</b>        |            |           |           |           | 0.956        |
| N0                        | 65         | 16        | 20        | 29        |              |
| N1,N2                     | 94         | 22        | 31        | 41        |              |
| <b>Clinical stage</b>     |            |           |           |           | 0.653        |
| I-IIB                     | 110        | 28        | 33        | 49        |              |
| III                       | 49         | 10        | 18        | 21        |              |
| *Chi-square test          |            |           |           |           |              |



**Table S6: Immunohistochemical analysis of lung adenocarcinoma (HLug-Ade150Sur-01)**

|                           |           | OGA level |           |           | p*           |
|---------------------------|-----------|-----------|-----------|-----------|--------------|
|                           |           | Low       | Moderate  | High      |              |
| <b>Total</b>              | 75        | 28        | 31        | 16        |              |
| <b>Gender</b>             |           |           |           |           | 0.015        |
| Male                      | 39        | 10        | 16        | 13        |              |
| Female                    | 36        | 18        | 15        | 3         |              |
| <b>Pathological grade</b> |           |           |           |           | 0.294        |
| I,I-II,II                 | 53        | 22        | 22        | 9         |              |
| II-III,III                | 22        | 6         | 9         | 7         |              |
| <b>Invasive depth</b>     |           |           |           |           | 0.223        |
| T1a-T2a                   | 21        | 10        | 10        | 1         |              |
| T2b-T4                    | 37        | 13        | 15        | 9         |              |
| <b>Node status</b>        |           |           |           |           | 0.61         |
| N0                        | 40        | 17        | 15        | 8         |              |
| N1-N2                     | 35        | 11        | 16        | 8         |              |
| <b>Clinical stage</b>     |           |           |           |           | <b>0.039</b> |
| <b>IA-IB</b>              | <b>23</b> | <b>12</b> | <b>10</b> | <b>1</b>  |              |
| <b>IIA-IV</b>             | <b>52</b> | <b>16</b> | <b>21</b> | <b>15</b> |              |
| *Chi-square test          |           |           |           |           |              |

**Table S7: OGAWt-binding proteins**

| <b>Gene description</b>                                                   | <b>Accession</b>     |
|---------------------------------------------------------------------------|----------------------|
| <b>MGEA5 Isoform 1 of Bifunctional protein NCOAT</b>                      | <b>IPI00477231.2</b> |
| PRMT5 Protein arginine N-methyltransferase 5                              | IPI00441473.3        |
| KRT1 Keratin, type II cytoskeletal 1                                      | IPI00220327.3        |
| PPM1B Isoform Beta-1 of Protein phosphatase 1B                            | IPI00026612.1        |
| HSPA1B;HSPA1A heat shock 70kDa protein 1B                                 | IPI00847536.1        |
| RBM10 Hypothetical protein DKFZp686E2459                                  | IPI00375731.1        |
| ACTB Actin, cytoplasmic 2                                                 | IPI00848058.1        |
| SCYL2 SCY1-like protein 2                                                 | IPI00396218.2        |
| RBM10 RNA binding motif protein 10                                        | IPI00549342.2        |
| STK38 Serine/threonine-protein kinase 38                                  | IPI00027251.1        |
| KRT9 Keratin, type I cytoskeletal 9                                       | IPI00019359.3        |
| EIF4B eukaryotic translation initiation factor 4B                         | IPI00439415.6        |
| NONO Non-POU domain-containing octamer-binding protein                    | IPI00304596.3        |
| FLNA Filamin-A                                                            | IPI00333541.6        |
| KRT10 Keratin, type I cytoskeletal 10                                     | IPI00009865.2        |
| TUBB Tubulin, beta polypeptide                                            | IPI00645452.1        |
| KRT2 Keratin, type II cytoskeletal 2 epidermal                            | IPI00021304.1        |
| PFKFB3 Isoform 1 of 6-phosphofructo-2-kinase/fructose-2,6-biphosphatase 3 | IPI00004511.3        |
| EEF1A1 Elongation factor 1-alpha 1                                        | IPI00396485.3        |
| TUBB2C Tubulin beta-2C chain                                              | IPI00007752.1        |
| CLOCK Circadian locomoter output cycles protein kaput                     | IPI00007284.1        |
| NCL Isoform 1 of Nucleolin                                                | IPI00604620.3        |
| ACTC1 Actin, alpha cardiac muscle 1                                       | IPI00023006.1        |
| TUBB2B Tubulin beta-2B chain                                              | IPI00031370.3        |
| PRPF31 Isoform 1 of U4/U6 small nuclear ribonucleoprotein Prp31           | IPI00292000.6        |
| HSPA8 Isoform 1 of Heat shock cognate 71 kDa protein                      | IPI00003865.1        |
| WDR77 Methylosome protein 50                                              | IPI00012202.1        |
| STK38L Serine/threonine-protein kinase 38-like                            | IPI00237011.5        |
| TUBB2A Tubulin beta-2A chain                                              | IPI00013475.1        |
| THRAP3 Thyroid hormone receptor-associated protein 3                      | IPI00104050.3        |
| SFPQ Isoform Long of Splicing factor, proline- and glutamine-rich         | IPI00010740.1        |
| TUBA1B Tubulin alpha-1B chain                                             | IPI00387144.4        |
| BCLAF1 Isoform 1 of Bcl-2-associated transcription factor 1               | IPI00006079.1        |
| BCLAF1 Isoform 3 of Bcl-2-associated transcription factor 1               | IPI00413672.1        |
| HSPD1 60 kDa heat shock protein, mitochondrial precursor                  | IPI00784154.1        |
| VIM Vimentin                                                              | IPI00418471.6        |
| TUBA1A Tubulin alpha-1A chain                                             | IPI00180675.4        |
| 67 kDa protein                                                            | IPI00020513.2        |
| TUBA1C Tubulin alpha-1C chain                                             | IPI00218343.4        |
| SF3B2 splicing factor 3B subunit 2                                        | IPI00221106.5        |
| HSPA5 HSPA5 protein                                                       | IPI00003362.2        |
| HSPA1L Heat shock 70kDa protein 1-like variant                            | IPI00643152.1        |
| NT5C2 Cytosolic purine 5'-nucleotidase                                    | IPI00029054.1        |

|                                                                           |               |
|---------------------------------------------------------------------------|---------------|
| PFKFB2 Isoform 1 of 6-phosphofructo-2-kinase/fructose-2,6-biphosphatase 2 | IPI00305589.3 |
| PKM2 Isoform M2 of Pyruvate kinase isozymes M1/M2                         | IPI00479186.5 |
| PKM2 58 kDa protein                                                       | IPI00784179.1 |
| HNRPH1 HNRPH1 protein                                                     | IPI00479191.2 |
| NPM1 Isoform 1 of Nucleophosmin                                           | IPI00549248.4 |
| PPIAL3;PPIA;LOC654188 Peptidyl-prolyl cis-trans isomerase A               | IPI00419585.9 |
| HSPA9 Stress-70 protein, mitochondrial precursor                          | IPI00007765.5 |
| Similar to Elongation factor 1-alpha 1                                    | IPI00180730.1 |

---

**Table S8: OGAhd-binding proteins**

| <b>Gene description</b>                                           | <b>Accession</b>               |
|-------------------------------------------------------------------|--------------------------------|
| MGEA5 Isoform 1 of Bifunctional protein NCOAT                     | IPI00477231.2                  |
| MGEA5 Isoform 2 of Bifunctional protein NCOAT                     | IPI00181391.8                  |
| SCYL2 SCY1-like protein 2                                         | IPI00396218.2                  |
| EIF4B eukaryotic translation initiation factor 4B                 | IPI00439415.6                  |
| KRT1 Keratin, type II cytoskeletal 1                              | IPI00220327.3                  |
| THRAP3 Thyroid hormone receptor-associated protein 3              | IPI00104050.3                  |
| Eukaryotic translation elongation factor 1 alpha-like 3           | IPI00472724.1                  |
| EEF1A2 Elongation factor 1-alpha 2                                | IPI00014424.1                  |
| Similar to Elongation factor 1-alpha 1                            | IPI00180730.1                  |
| HSPA1B;HSPA1A heat shock 70kDa protein 1B                         | IPI00847536.1                  |
| NONO Non-POU domain-containing octamer-binding protein            | IPI00304596.3                  |
| KRT2 Keratin, type II cytoskeletal 2 epidermal                    | IPI00021304.1                  |
| KRT9 Keratin, type I cytoskeletal 9                               | IPI00019359.3                  |
| FLNA Filamin-A                                                    | IPI00333541.6                  |
| KRT10 Keratin, type I cytoskeletal 10                             | IPI00009865.2                  |
| PRPF31 Isoform 1 of U4/U6 small nuclear ribonucleoprotein Prp31   | IPI00292000.6                  |
| BCLAF1 Isoform 1 of Bcl-2-associated transcription factor 1       | IPI00006079.1                  |
| STK38 Serine/threonine-protein kinase 38                          | IPI00027251.1                  |
| TUBA1B Tubulin alpha-1B chain                                     | IPI00387144.4                  |
| NCL Isoform 1 of Nucleolin<br>31 kDa protein                      | IPI00604620.3<br>IPI00479366.1 |
| RBM10 Hypothetical protein DKFZp686E2459                          | IPI00375731.1                  |
| MYH9 Myosin-9                                                     | IPI00019502.3                  |
| BCLAF1 Isoform 4 of Bcl-2-associated transcription factor 1       | IPI00413673.1                  |
| SFPQ Isoform Long of Splicing factor, proline- and glutamine-rich | IPI00010740.1                  |
| PPM1B Isoform Beta-1 of Protein phosphatase 1B                    | IPI00026612.1                  |
| DDX3X ATP-dependent RNA helicase DDX3X                            | IPI00215637.5                  |
| PRMT5 Protein arginine N-methyltransferase 5                      | IPI00441473.3                  |
| STK38L Serine/threonine-protein kinase 38-like                    | IPI00237011.5                  |
| HNRPK Isoform 2 of Heterogeneous nuclear ribonucleoprotein K      | IPI00216746.1                  |
| SLC25A5 ADP/ATP translocase 2                                     | IPI00007188.5                  |
| GSTO1 Glutathione transferase omega-1                             | IPI00019755.3                  |
| NT5C2 Cytosolic purine 5'-nucleotidase                            | IPI00029054.1                  |
| ASCC3L1 U5 small nuclear ribonucleoprotein 200 kDa helicase       | IPI00420014.2                  |
| SLC25A6 ADP/ATP translocase 3                                     | IPI00291467.7                  |
| IPO8 Importin-8                                                   | IPI00007401.1                  |
| LOC144097 Hypothetical protein LOC144097                          | IPI00106955.3                  |
| PARP1 Poly [ADP-ribose] polymerase 1                              | IPI00449049.5                  |
| SF3B3 Isoform 1 of Splicing factor 3B subunit 3                   | IPI00300371.5                  |
| SF3B4 Splicing factor 3B subunit 4                                | IPI00017339.1                  |

## **Extended Materials and Methods**

### **Gene expression analysis**

Data for OGT, OGA, and HBP gene expression analysis were obtained from the commercially available Oncomine database (Life Technologies).

### **Immunohistochemistry**

Tissue microarrays for colon cancer (OD-CT-DgCol03-002), breast cancer (OD-CT-RpBre03-004), lung cancer (Hlug-Ade090Lym-01), were purchased from Shanghai Outdo Biotech Company. Tissue microarray for lymphoma was obtained from the Memorial Sloan Kettering Cancer Center histology core facility. Anti-OGT (ab96718) and anti-OGA (NBP1-96679) antibodies were purchased from Abcam and Novus, respectively. Immunohistochemistry was performed as follows: after baking on a panel at 70°C, formalin-fixed paraffin-embedded tissue samples were deparaffinized with xylenes and rehydrated through gradient ethanol immersion. Endogenous peroxidase activity was quenched by incubation with 3% (v/v) hydrogen peroxide in methanol for 12 minutes, followed by three 3-minute washes with PBS. The sections were then blocked with 10% (v/v) normal goat serum in PBS for 25 minutes, followed by overnight incubation with primary antibody in a moist chamber at 4°C. Primary antibodies were diluted in PBS containing 1% (w/v) BSA and pre-immune mouse serum was substituted for primary antibody as a negative control. After three 5-minute washes with PBS, the sections were incubated with secondary antibody for 25 minutes at room temperature, followed by three additional 5-minute washes with PBS. Reaction products were visualized with diaminobenzidine (DAB, ZLI-9032, ZSGB) at room temperature. After being counterstained with Harris hematoxylin (ZLI-9039, ZSGB) for 4 minutes and rinsed with tap water, the sections were immediately dehydrated by sequential immersion in gradient ethanol and xylenes and mounted with resin and cover slips. Images were obtained using an Olympus BX51 light microscope equipped with a DP70 digital camera. For evaluation of cell staining, sections were examined by

two independent observers without prior knowledge of the clinical or clinicopathological status of the specimens. Antigen expression levels were stratified into low, moderate, or high by optical evaluation. Staining of less than 10% of the cancer cells in a core was classified as negative.

### **Flag-OGA affinity purification and MudPIT analysis**

Flag-OGA protein complexes were purified from whole cell lysates by immunoprecipitation with anti-Flag M2 affinity gel (Sigma). Briefly, HeLa cells transiently transfected with Flag-OGA were washed twice with cold PBS, detached from culture dishes using a cell scraper, collected in 50 mL tubes, and centrifuged at 500g at 4°C to obtain cell pellets. In the cold room, cell pellets were lysed for 30 minutes in cold NETN buffer with protease and protein phosphatase inhibitors. Whole cell lysates were centrifuged at 15,000 RPM at 4°C and supernatants were collected. Flag M2 beads were activated by sequential washing with cold PBS, 100 mM glycine, and NETN buffer (three times per buffer). In the cold room, activated Flag M2 beads were incubated with whole cell lysates for 2 hours to allow the beads to capture Flag-OGA. Protein-bound beads were collected by centrifuging at 200g at 4°C and transferred to 5 mL columns for washing and elution. Flag-OGA was eluted using 100 µg/mL Flag peptide (Sigma) in washing buffer. Silver staining and Western blotting were performed to confirm the presence of Flag-OGA among the purified proteins. The purified proteins were stored at -80°C for use in acetyltransferase activity assays. For MudPIT analysis, trichloroacetic acid (TCA) precipitation and acetone washing to remove TCA were performed. MudPIT analysis was performed as described in the literature<sup>3</sup>.

### **Acetyltransferase activity assay**

Recombinant PKM2 was purchased from Novus. Flag-OGA<sup>wt</sup> or Flag-OGA<sup>hd</sup> was expressed in HEK293T cells and purified using a Flag affinity column. Acetyltransferase activity assay was

performed using the HAT Activity Colorimetric Assay Kit (Biovision) with OGA as the enzyme and PKM2 as the substrate.

### **HN-PKM2 affinity purification from mammalian cells**

HEK293T cells transiently transfected with HN-PKM2 were collected using a cell scraper and lysed in a 1% Nonidet P-40, 50 mM HEPES buffer with protease, protein phosphatase, and O-GlcNAcase inhibitors. Supernatants of whole cell lysates were allowed to flow through pre-equilibrated TALON Metal Affinity Resin (Clontech). Bound protein was eluted using 200 mM imidazole and desalting columns were used for removal of imidazole and buffer exchange. Silver staining and Western blotting were performed to confirm the presence of HN-PKM2 among the purified proteins. For identification of O-GlcNAc sites by CID-MS, the purified proteins were concentrated using a 3 kDa cutoff centrifugal filter, resolved by SDS-PAGE, and stained with a Coomassie blue dye to visualize 50-75 kDa protein bands for excision.

### **Identification of O-GlcNAc sites by CID-MS**

Protein bands were excised from Coomassie-stained gels, destained, and subjected to in-gel trypsin digestion. Briefly, digestion was performed with 12.5 ng/ $\mu$ L trypsin in 50 mM ammonium bicarbonate and incubated overnight at 37°C. The resulting peptides were extracted with 50% acetonitrile/5% formic acid and dried in a vacuum centrifuge. Prior to measurement, dried peptides were dissolved in 0.1% formic acid. The peptide mixtures were pressure-loaded onto a 250 micron internal diameter fused silica capillary (Polymicro Technologies) column with a Kasil frit packed with 2.5 cm of 5 micron Partisphere strong cation exchange (SCX) resin (Whatman) and 2.5 cm of 5 micron C18 resin (Phenomenex). After desalting, this bi-phasic column was connected to a 100 micron internal diameter fused silica capillary (Polymicro Technologies) analytical column with a 3 micron pulled-tip, packed with 10 cm of 3 micron C18 resin (Phenomenex). The entire three-phase column was placed inline with a 1200 quaternary HPLC

pump (Agilent) and analyzed using a modified 12-step separation as described in the literature<sup>4</sup>. As peptides were eluted from the microcapillary column, they were electrosprayed directly into a hybrid LTQ Orbitrap mass spectrometer (Thermo Fisher Scientific). MS instrument method consisted of an FT full-scan MS analysis (400-1600  $m/z$ , 60000 resolution) followed by data-dependent MS/MS scans of the 8 most intense precursors at 35% normalized collision energy with dynamic exclusion for 60 s. Applications of mass spectrometer scan functions and HPLC solvent gradients were controlled by the Xcalibur data system (Thermo Scientific). MS/MS spectra were extracted using RawXtract (version 1.9.9)<sup>1</sup>. MS/MS spectra were searched using the ProLuCID algorithm against a human IPI database concatenated to a decoy database in which the sequence for each entry in the original database was reversed<sup>2, 5</sup>. The ProLuCID search was performed using half enzyme specificity, differential modification of serine and threonine due to O-GlcNAc (203.0794). ProLuCID search results were assembled and filtered using the DTASelect (version 2.0) algorithm. The protein identification false positive rate was kept below one percent and all peptide-spectra matches had less than 5 ppm mass error.



## Supplemental References

- 1 McDonald WH, Tabb DL, Sadygov RG, MacCoss MJ, Venable J, Graumann J *et al.* MS1, MS2, and SQT-three unified, compact, and easily parsed file formats for the storage of shotgun proteomic spectra and identifications. *Rapid communications in mass spectrometry* : RCM 2004; 18: 2162-2168.
- 2 Peng J, Elias JE, Thoreen CC, Licklider LJ, Gygi SP. Evaluation of multidimensional chromatography coupled with tandem mass spectrometry (LC/LC-MS/MS) for large-scale protein analysis: the yeast proteome. *Journal of proteome research* 2003; 2: 43-50.
- 3 Ruan HB, Han X, Li MD, Singh JP, Qian K, Azarhoush S *et al.* O-GlcNAc transferase/host cell factor C1 complex regulates gluconeogenesis by modulating PGC-1alpha stability. *Cell metabolism* 2012; 16: 226-237.
- 4 Washburn MP, Wolters D, Yates JR, 3rd. Large-scale analysis of the yeast proteome by multidimensional protein identification technology. *Nat Biotechnol* 2001; 19: 242-247.
- 5 Xu T, Venable JD, Park SK, Cociorva D, Lu B, Liao L *et al.* ProLuCID, a fast and sensitive tandem mass spectra-based protein identification program. *Molecular & Cellular Proteomics* 2006; 5: S174-S174.
